# Supplementary material for: Solution-processed inverted polymer solar cells using chemical bath deposited CdS films as electron collecting layer
Source: Royal Society of Chemistry journal article supplement (doi:10.1039/c2ce25698c), 2012-01-01
Supplement: c2ce25698c.pdf [file c2ce25698c.pdf]

## Supplementary Information

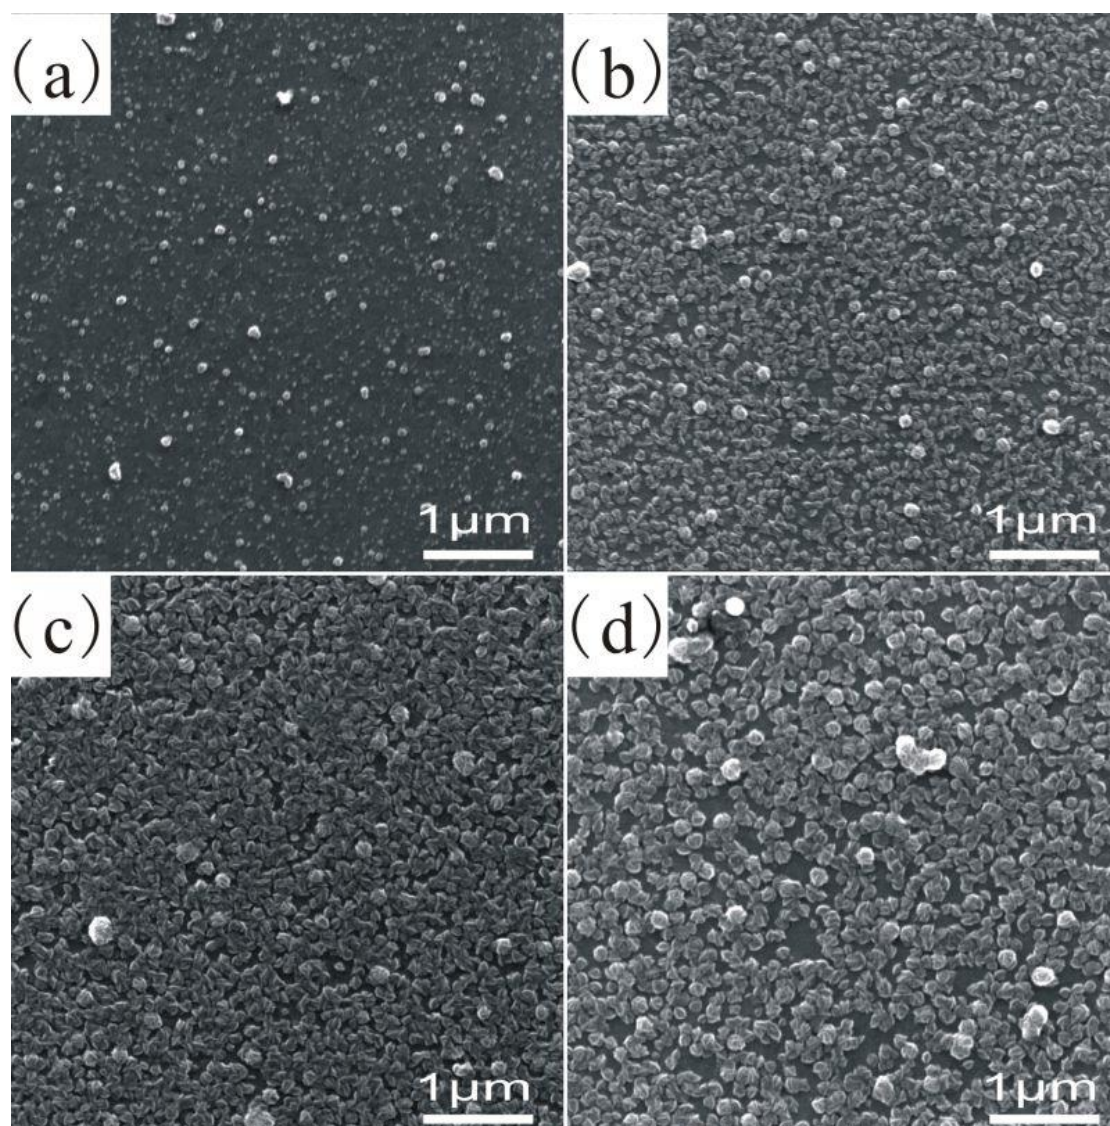

**Figure S1.** SEM images of CBD-grown CdS films on ITO substrates deposited at 50 °C with various deposition time: (a) 0.5 hour, (b) 1 hour, (c) 2 hours, (d) 3 hours.

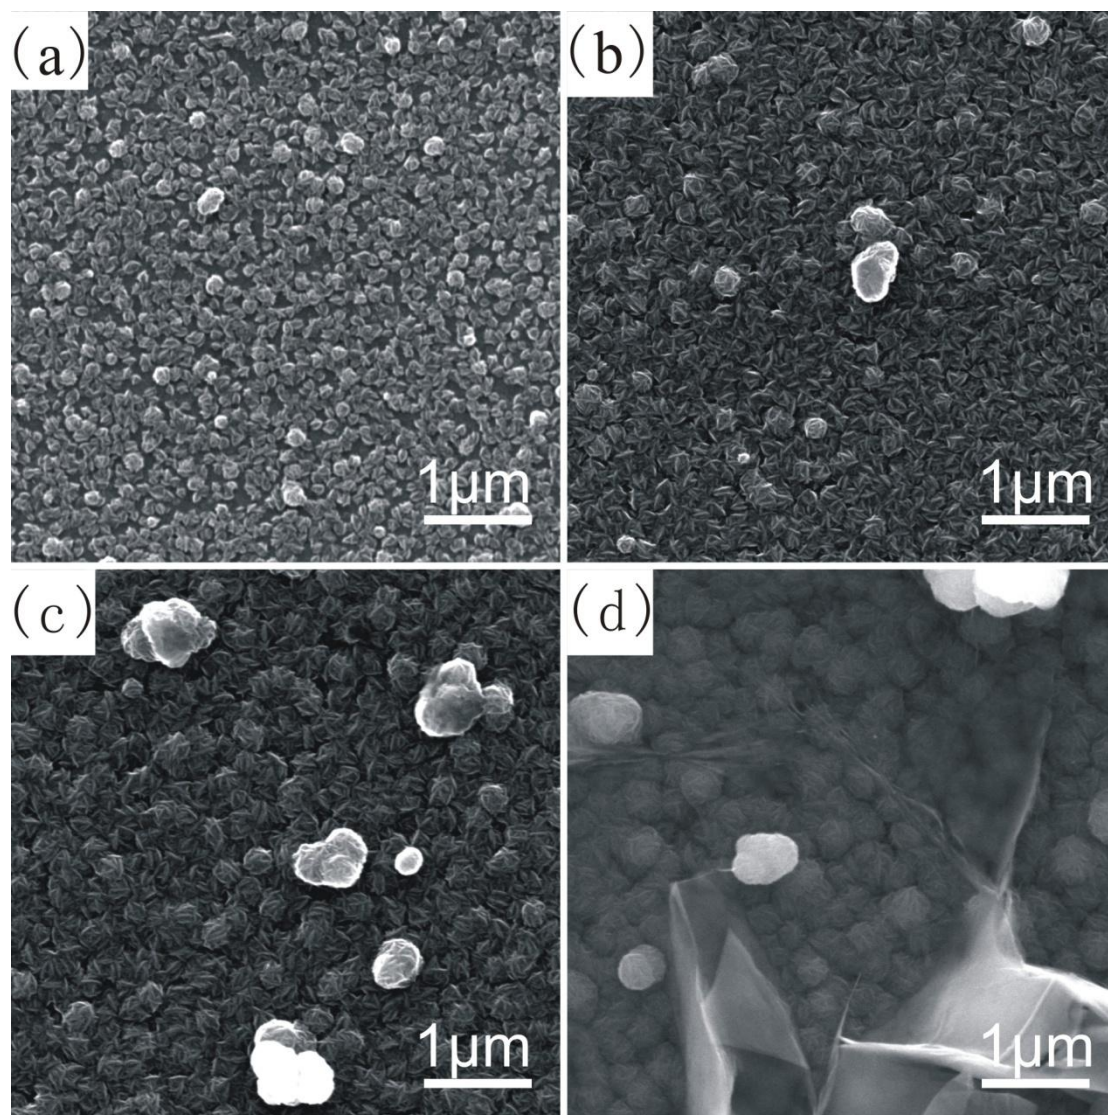

**Figure S2.** SEM images of CBD-grown CdS films on ITO substrates deposited at 80 °C with various deposition time: (a) 0.5 hour, (b) 1 hour, (c) 1.5 hours, (d) 2 hours.
